# Supplementary material for: Nucleolar Proteins Suppress Caenorhabditis elegans Innate Immunity by Inhibiting p53/CEP-1
Source: PubMed Central journal article supplement (PMC2734340; doi:10.1371/journal.pgen.1000657), 2009-09-18

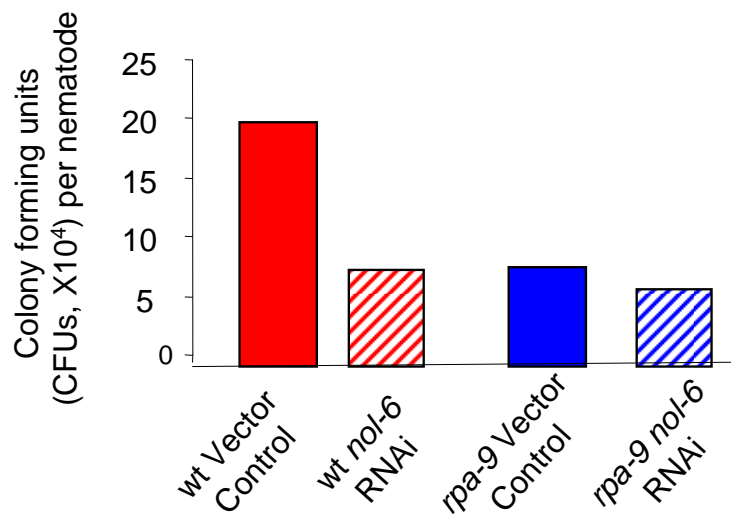

Supplement: pgen.1000657.s005.pdf [file pgen.1000657.s005.pdf]
